Typeset, Printed and Published by  
The Company of Biologists Limited  
Department of Zoology, University of Cambridge, Downing Street,  
Cambridge CB2 3EJ

© The Company of Biologists Limited 1984

## Erratum

Fibre order in the normal *Xenopus* optic tract, near the chiasma.

By J. W. FAWCETT, J. S. H. TAYLOR, R. M. GAZE, P. GRANT  
AND E. HIRST

*J. Embryol. exp. Morph.* **83**, 1–14

In paragraph 1 of the Summary of this paper the word 'thymidine' should read 'proline'.
